# Supplementary material for: Excess Enthalpies Analysis of Biofuel Components: Sunflower Oil–Alcohols Systems
Source: MDPI journal article supplement (doi:10.3390/ijms25063244), 2024-03-13
Supplement: s1 [file s1]

## **Supplementary materials**

# **Excess Enthalpies Analysis of Biofuel Components: Sunflower Oil - Alcohols Systems**

**Alexandra Golikova \*, Anna Shasherina, Yuri Anufrikov, Georgii Misikov, Petr Kuzmenko, Alexander Smirnov,  
Maria Toikka and Alexander Toikka**

*Institute of Chemistry, St. Petersburg State University, Universitetskiy Prospekt 26, Peterhof, Saint Petersburg 198504, Russia*

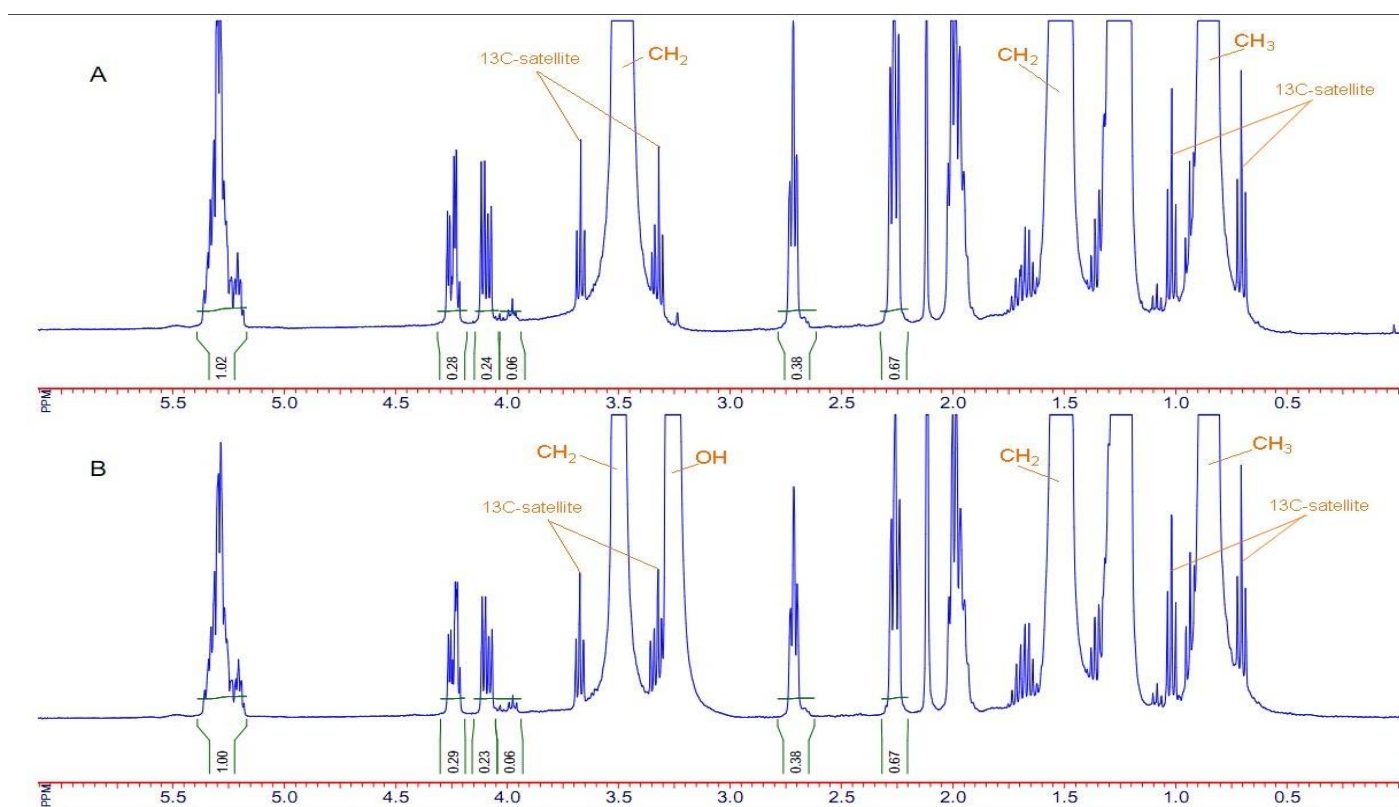

**Figure S1.**  $^1\text{H}$  NMR spectra comparison of the sunflower oil – n-propanol solution before (B) and after (A) heating

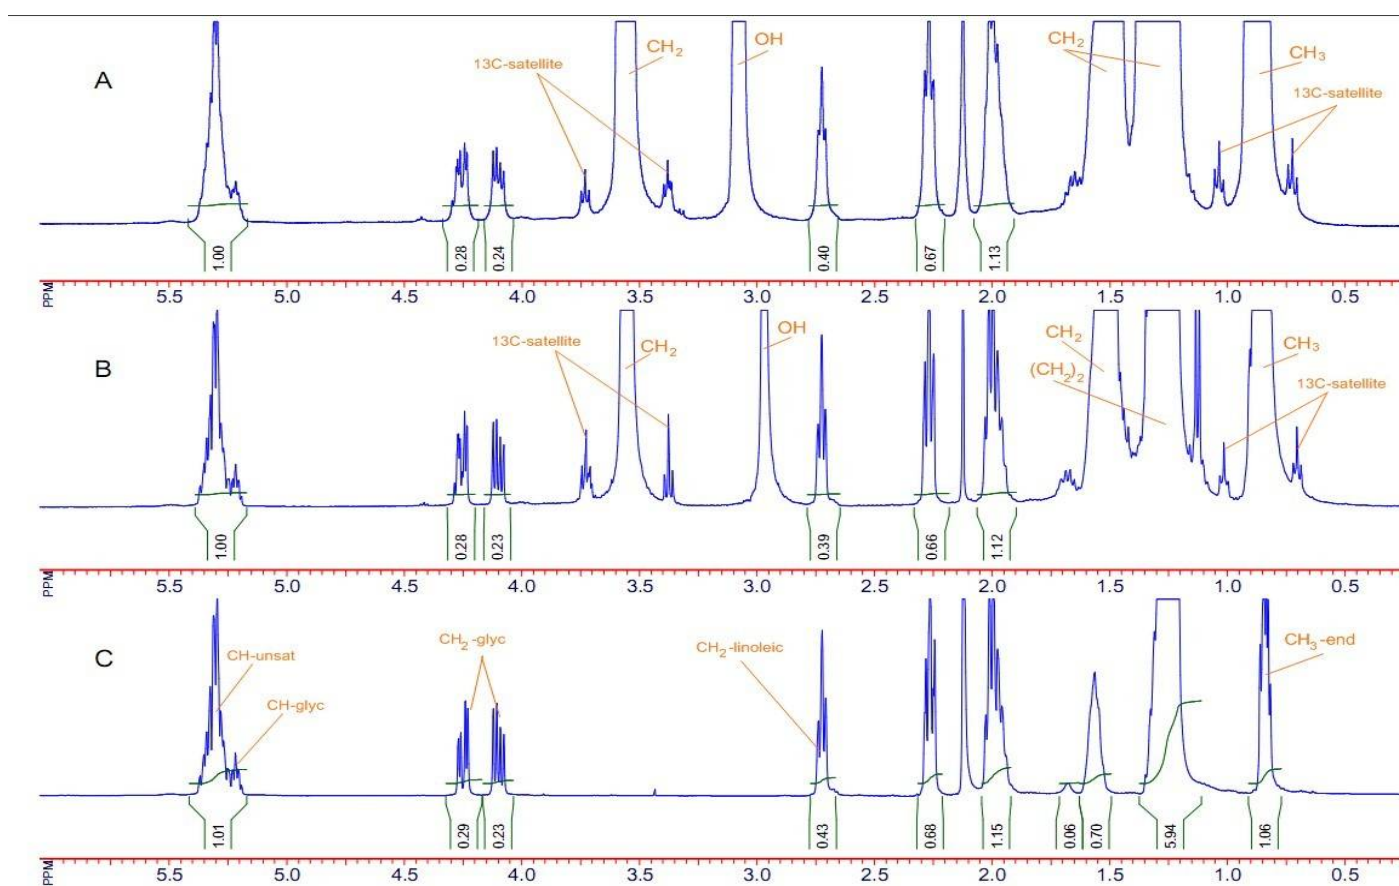

**Figure S2.**  $^1\text{H}$  NMR spectra comparison of the pure sunflower oil (C) and sunflower oil – n-butanol (A), sunflower oil – n-pentanol (B) systems after heating

# Display Report

## Analysis Info

Analysis Name D:\Data\Work\2023\11\15\00-.d  
Method 20230815\_tune\_high\_neg.m  
Sample Name BuOH  
Comment

Acquisition Date 15-Nov-23 13:04:50

Operator BDAL@DE  
Instrument / Ser# maXis 62

## Acquisition Parameter

|             |            |                      |          |                  |           |
|-------------|------------|----------------------|----------|------------------|-----------|
| Source Type | ESI        | Ion Polarity         | Negative | Set Nebulizer    | 0.8 Bar   |
| Focus       | Not active |                      |          | Set Dry Heater   | 180 °C    |
| Scan Begin  | 50 m/z     | Set Capillary        | 5500 V   | Set Dry Gas      | 4.0 l/min |
| Scan End    | 3000 m/z   | Set End Plate Offset | -500 V   | Set Divert Valve | Source    |

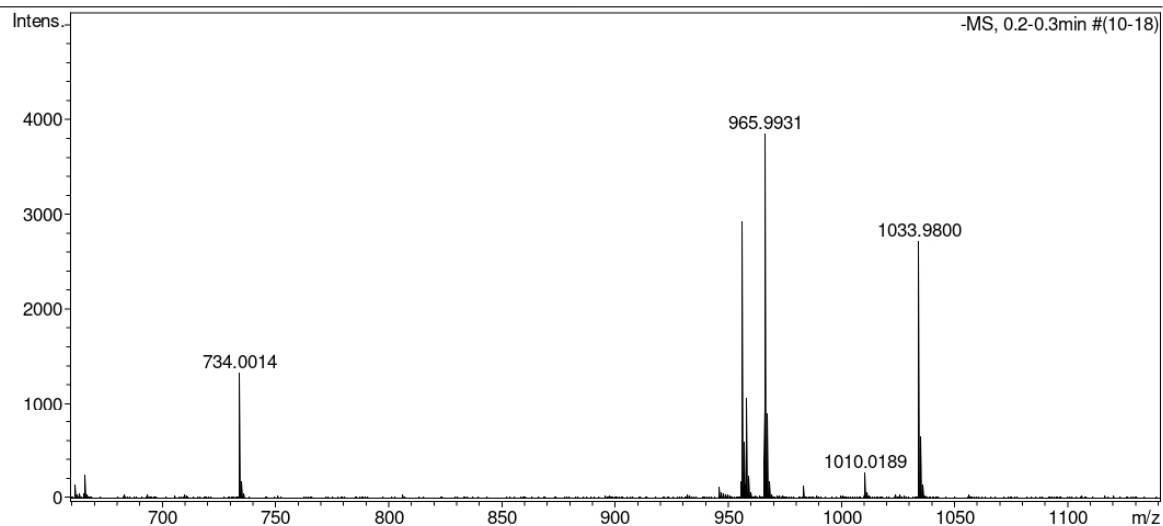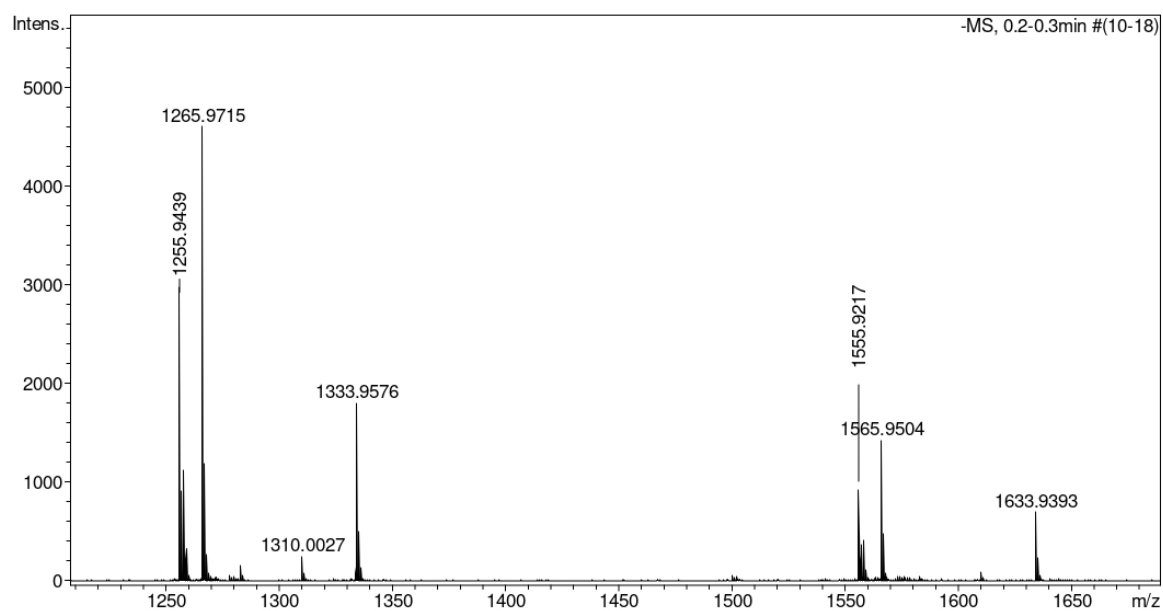

Figure S3. Mass-spectrum of the oil under study obtained by ESI-MS

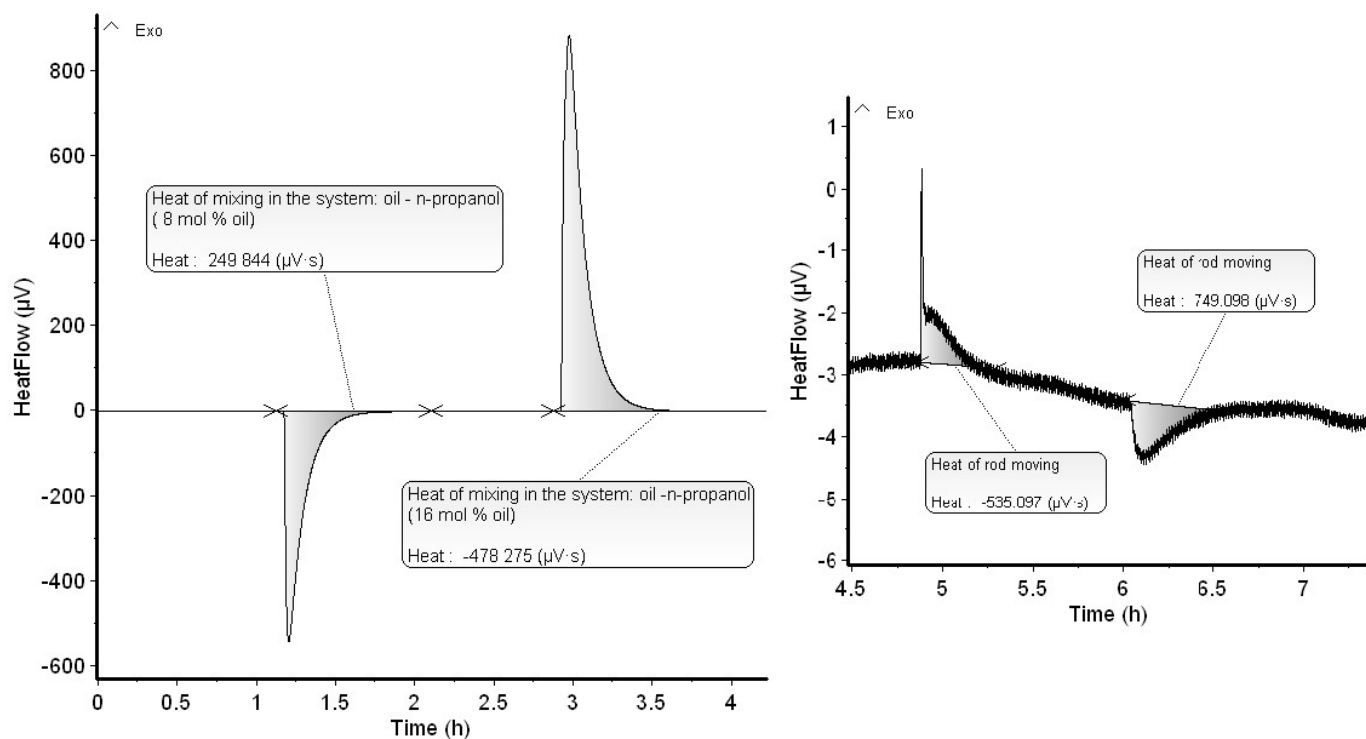

**Figure S4.** Example of a signal obtained on a C80 calorimeter and its processing in the Calisto program (sunflower oil – n-propanol system)

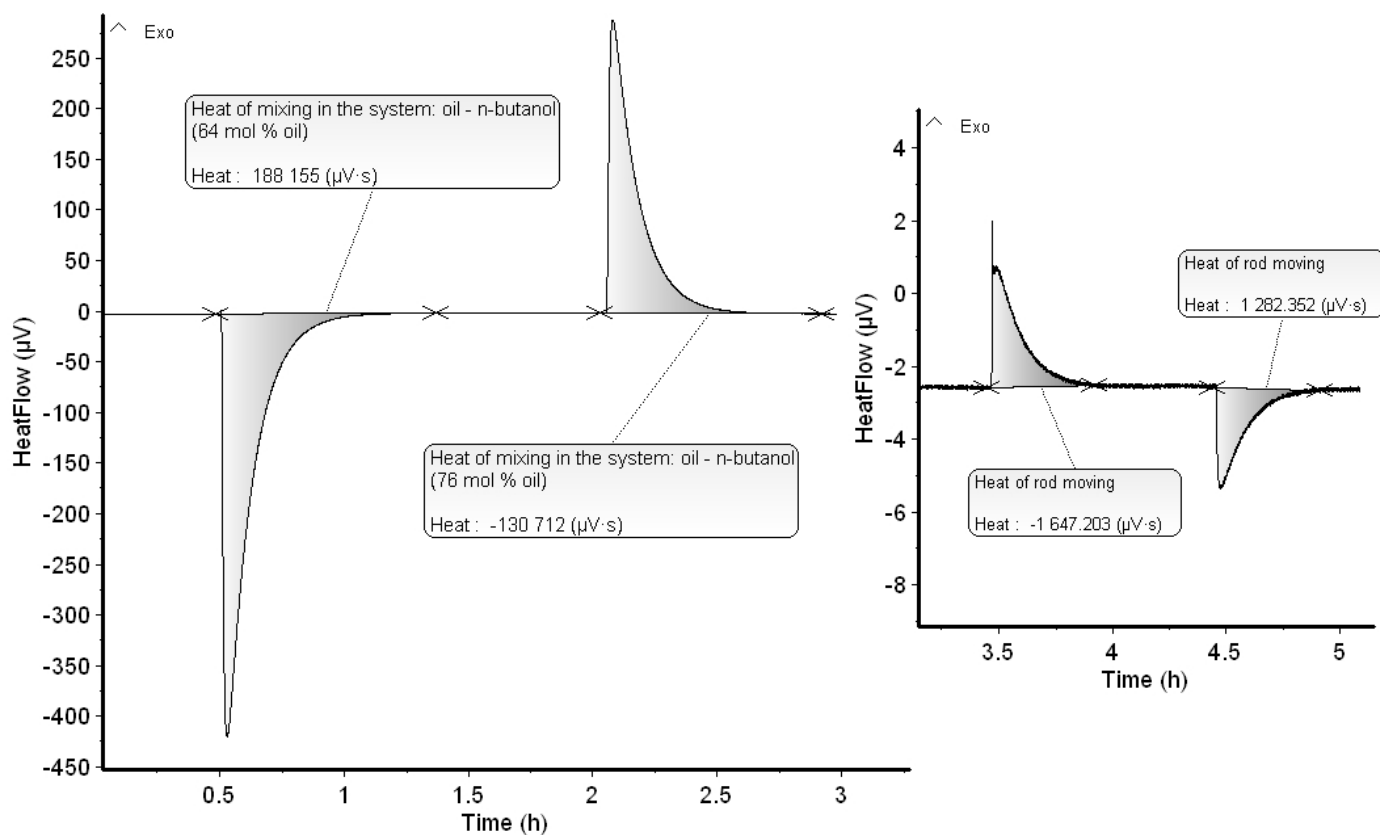

**Figure S5.** Example of a signal obtained on a C80 calorimeter and its processing in the Calisto program (sunflower oil – n-butanol system)

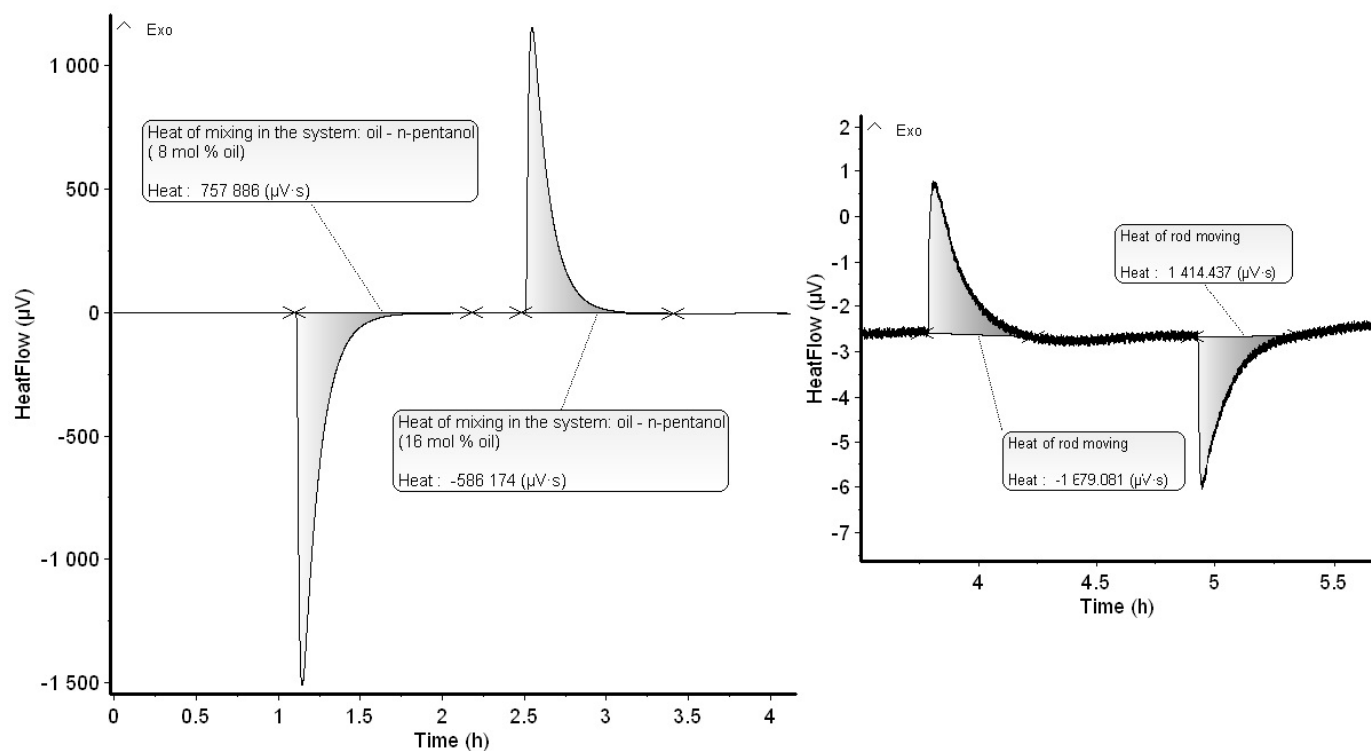

**Figure S6.** Example of a signal obtained on a C80 calorimeter and its processing in the Calisto program (sunflower oil – n-pentanol system)

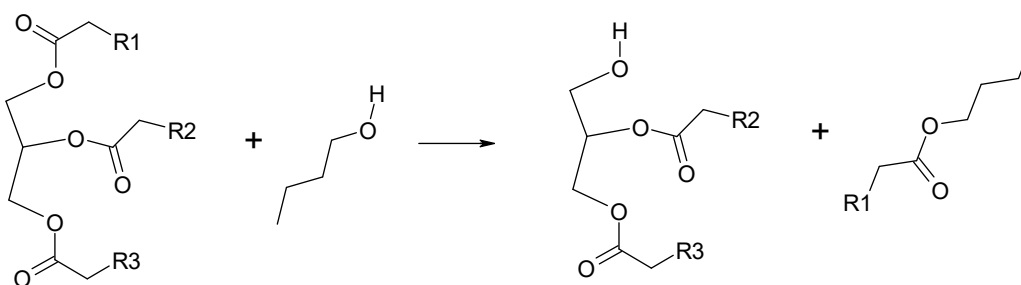

**Figure S7.** Transesterification reaction of triglyceride with alcohols
